# Supplementary material for: Toward highly efficient bifunctional electrocatalysts for zinc–air batteries: from theoretical prediction to a ternary FeCoNi design
Source: Royal Society of Chemistry journal article supplement (doi:10.1039/d2nr04741a), 2022-01-01
Supplement: d2nr04741a1.pdf [file d2nr04741a1.pdf]

## Supporting Information

### **Toward highly efficient bifunctional electrocatalysts for zinc-air battery:**

### **From theoretical prediction to ternary FeCoNi design**

Wenhao Tang <sup>a</sup>, Jialin He <sup>c</sup>, Kewei Teng <sup>b</sup>, Lei Gao <sup>c</sup>, Ruiyu Qi <sup>b</sup>, Yirui Deng <sup>a</sup>, Ruiping Liu <sup>a, b, \*</sup>,  
Ang Li <sup>d</sup>, Huadong Fu <sup>c, \*</sup>, Chang-an Wang <sup>e, \*</sup>

<sup>a</sup> School of Chemical & Environmental Engineering, China University of Mining and Technology (Beijing), Beijing 100083, P. R. China

<sup>b</sup> Department of Materials Science and Engineering, China University of Mining and Technology (Beijing), Beijing 100083, P. R. China

<sup>c</sup> Institute for Advanced Materials and Technology, University of Science and Technology Beijing, Beijing 100083, P. R. China

<sup>d</sup> Beijing Key Laboratory of Microstructure and Property of Advanced Materials, Beijing University of Technology, Beijing 100124, P. R. China

<sup>e</sup> State Key Laboratory of New Ceramics and Fine Processing, School of Materials Science and Engineering, Tsinghua University, Beijing 100084, P. R. China

\*Corresponding authors. E-mail:

Prof. R. P. Liu, E-mail: [lrp@cumtb.edu.cn](mailto:lrp@cumtb.edu.cn).

Prof. H. D. Fu, E-mail: [hdfu@ustb.edu.cn](mailto:hdfu@ustb.edu.cn).

Prof. C. A. Wang, Email: [wangca@mail.tsinghua.edu.cn](mailto:wangca@mail.tsinghua.edu.cn).

## 1. Supplementary Figures

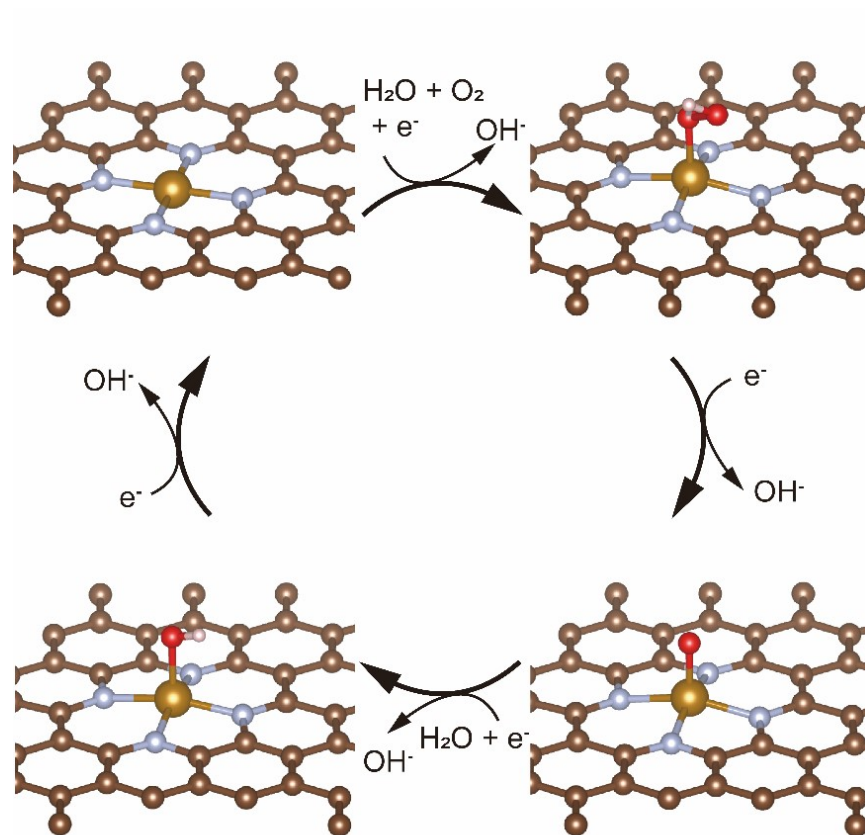

**Fig. S1** The mechanism of 4e<sup>-</sup> ORR in alkaline medium occurring on the Fe atom single-site of Fe-N<sub>4</sub>.

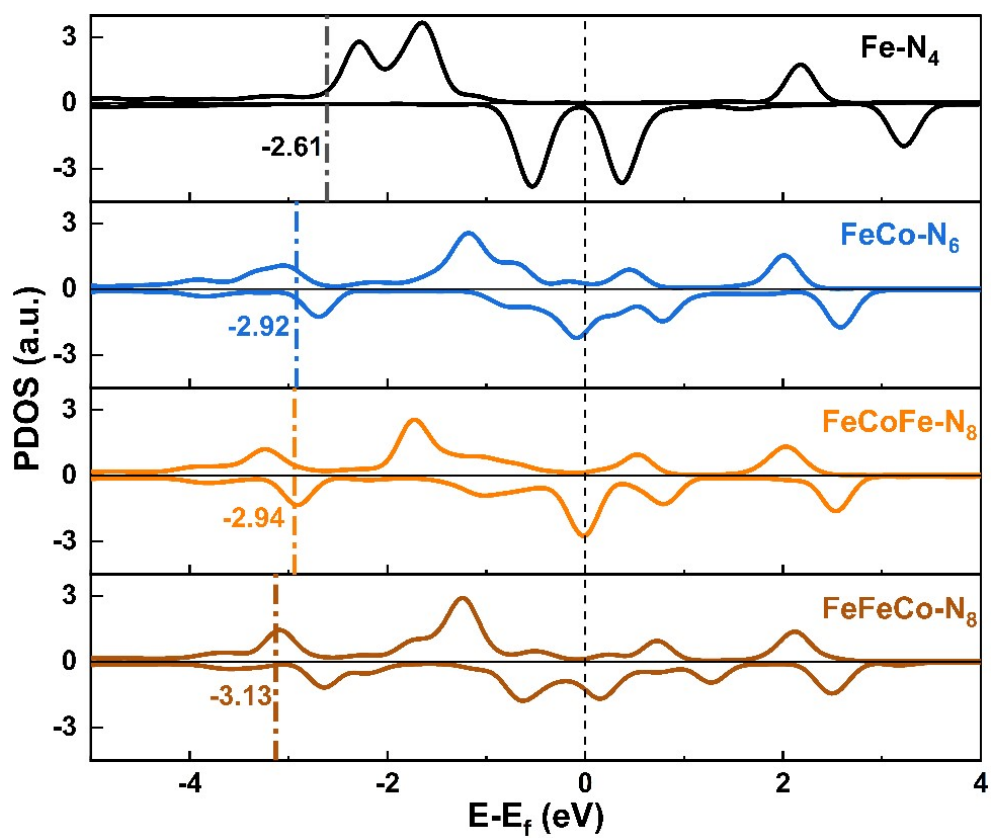

**Fig. S2** The partial density of states (PDOSs) of Fe-3d orbitals in Fe-N<sub>4</sub>, FeCo-N<sub>6</sub>, FeCoFe-N<sub>8</sub> and FeFeCo-N<sub>8</sub>.

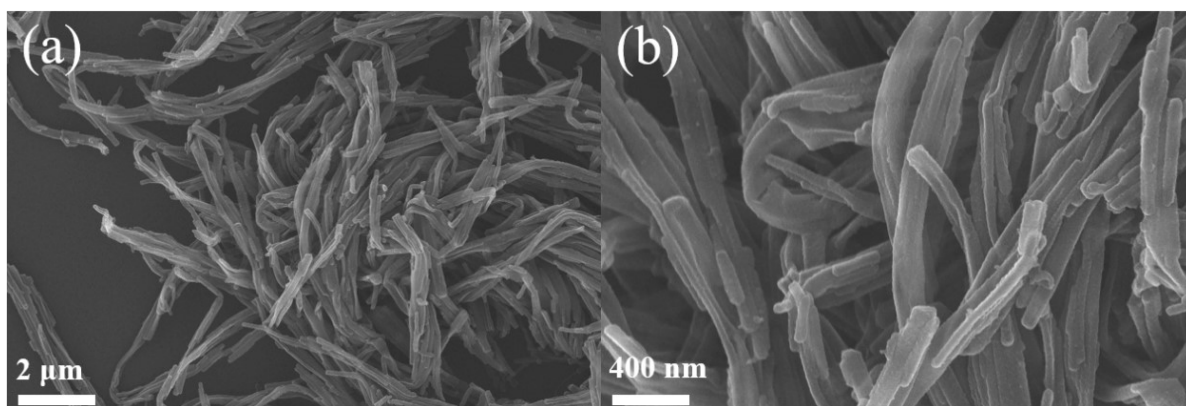

**Fig. S3** SEM images of PPy-NTs.

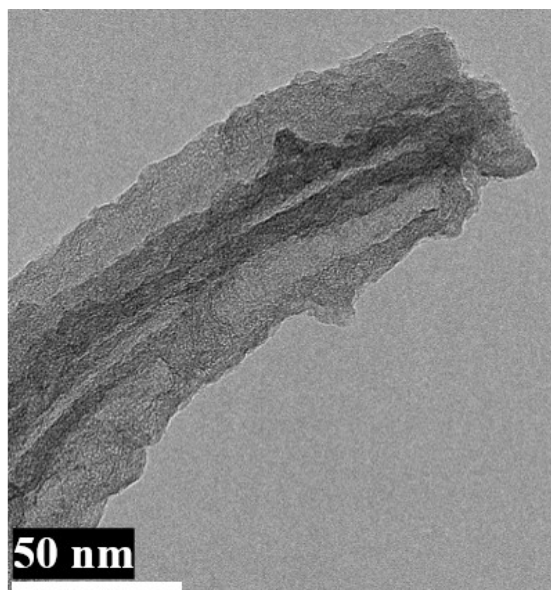

**Fig. S4** TEM image of hNCTs.

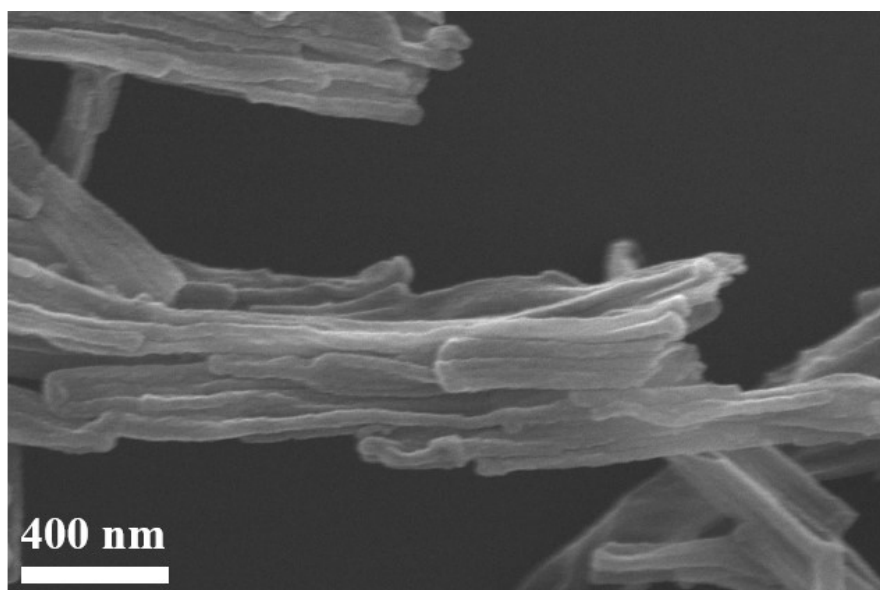

**Fig. S5** SEM image of  $\text{Fe}_4\text{Co}_1\text{Ni}_2@$ hNCTs.

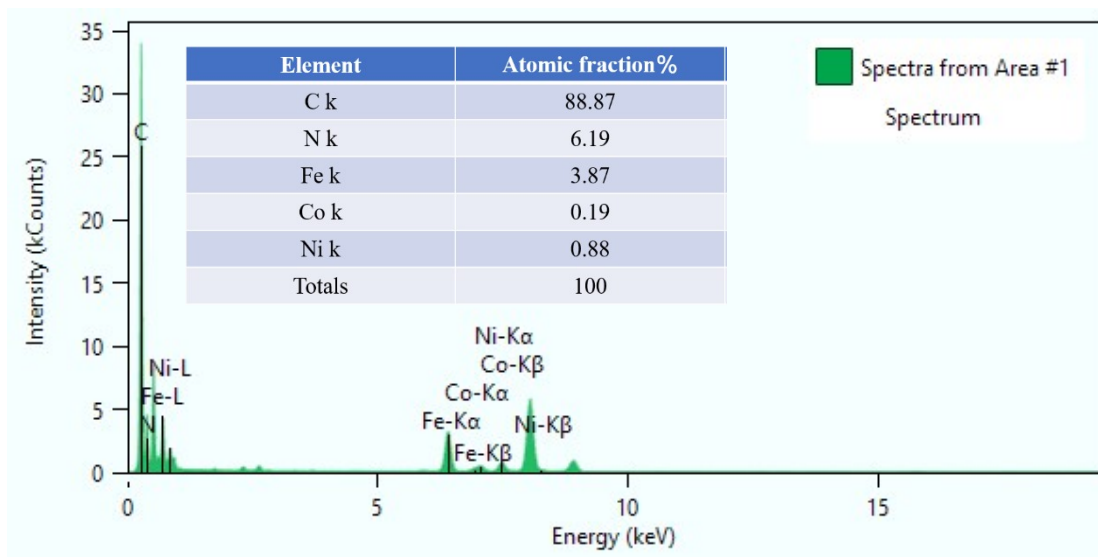

**Fig. S6** EDX spectrum of the  $\text{Fe}_4\text{Co}_1\text{Ni}_2@h\text{NCTs}$ .

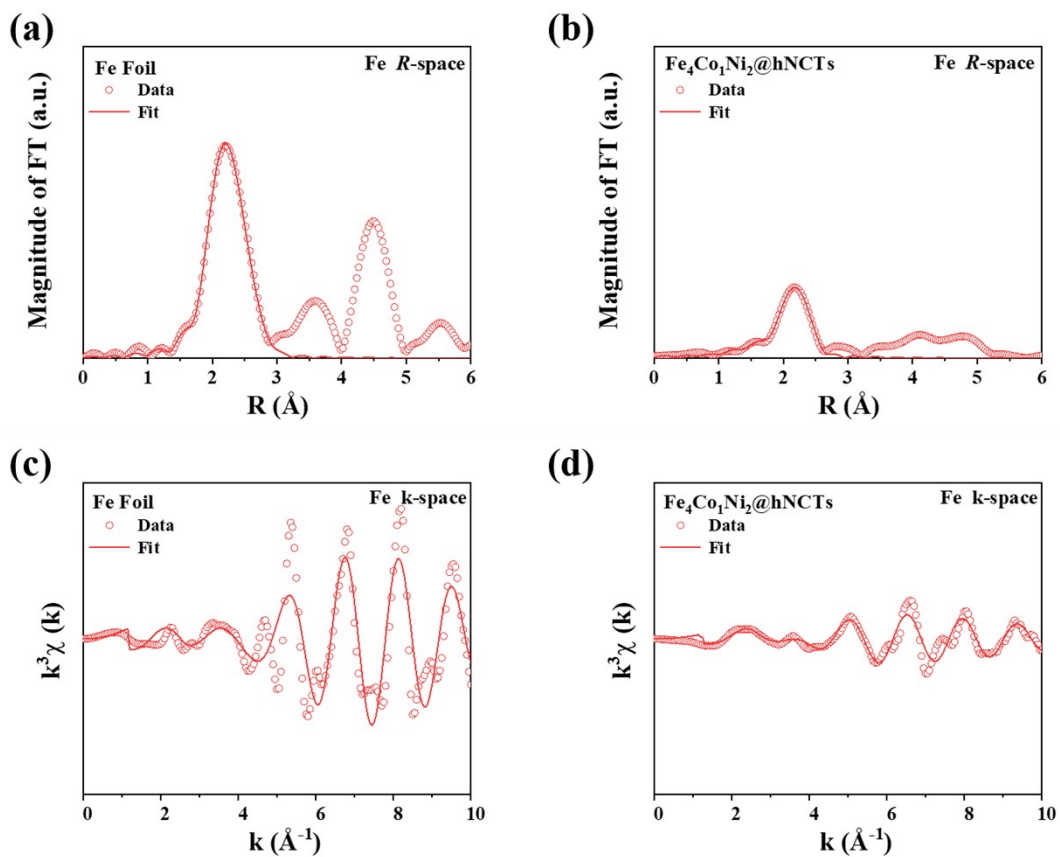

**Fig. S7** The FT-EXAFS fitting curve of Fe foil at R-space (a) and k-space (c); The FT-EXAFS fitting curve of  $\text{Fe}_4\text{Co}_1\text{Ni}_2@h\text{NCTs}$  at R-space (b) and k-space (d).

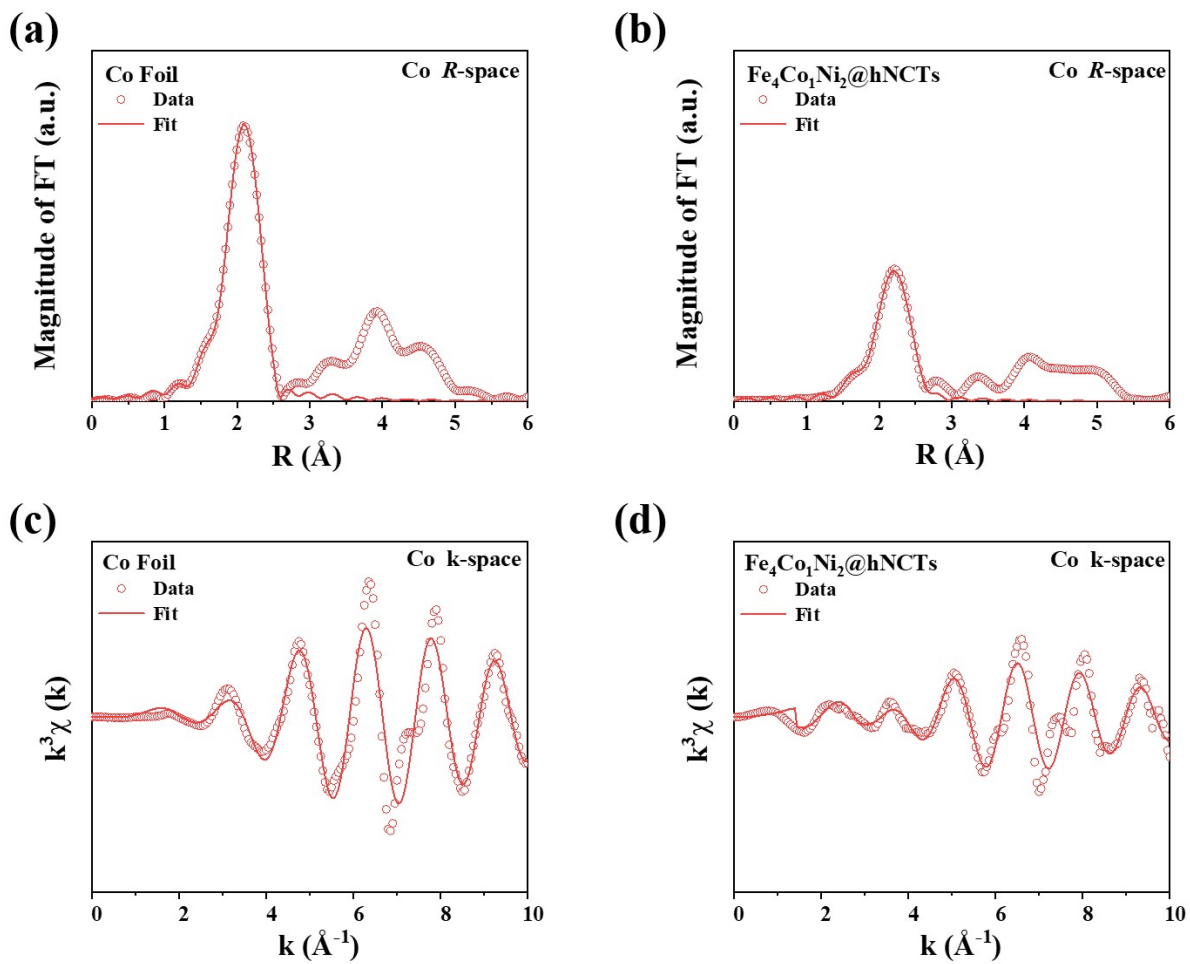

**Fig. S8** The FT-EXAFS fitting curve of Co foil at R-space (a) and k-space (c); The FT-EXAFS fitting curve of  $\text{Fe}_4\text{Co}_1\text{Ni}_2@h\text{NCTs}$  at R-space (b) and k-space (d).

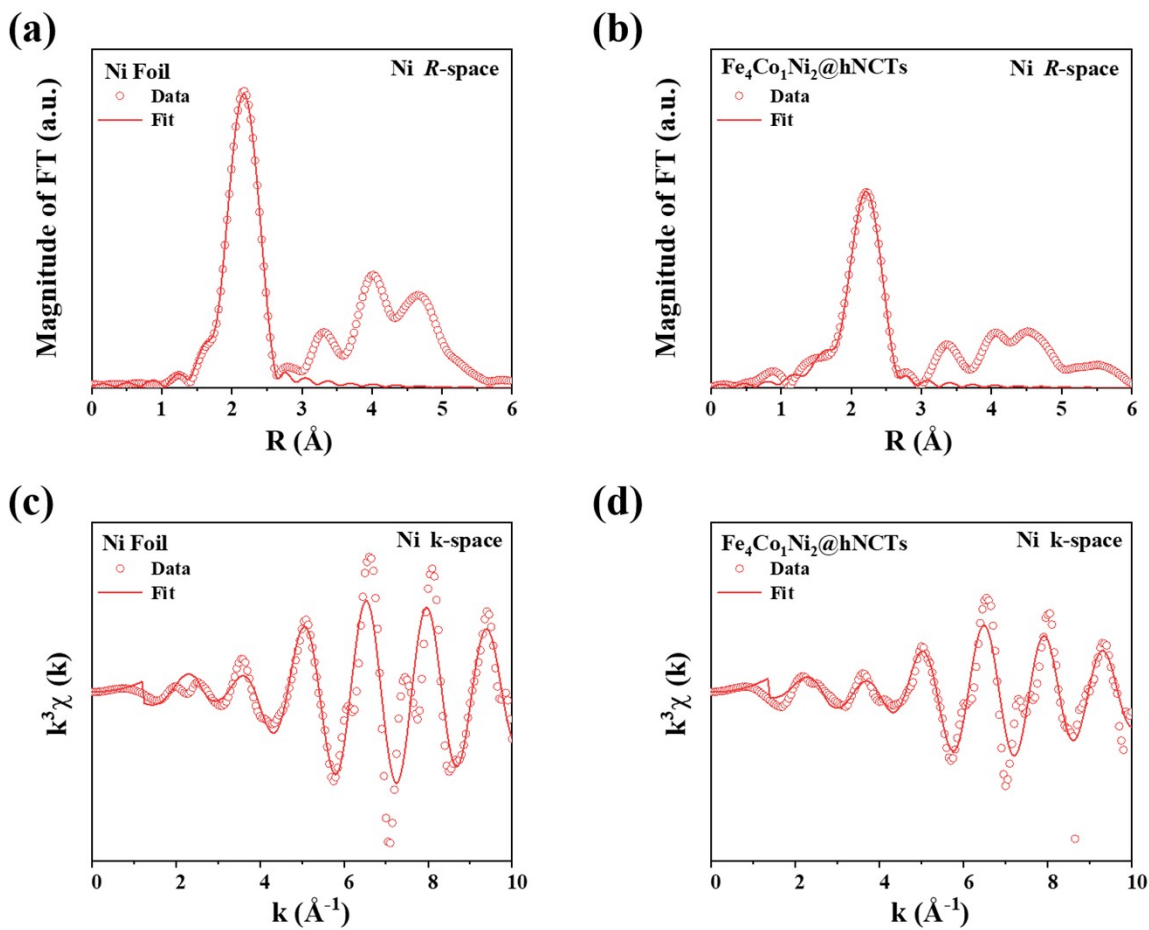

**Fig. S9** The FT-EXAFS fitting curve of Ni foil at R-space (a) and k-space (c); The FT-EXAFS fitting curve of  $\text{Fe}_4\text{Co}_1\text{Ni}_2@h\text{NCTs}$  at R-space (b) and k-space (d).

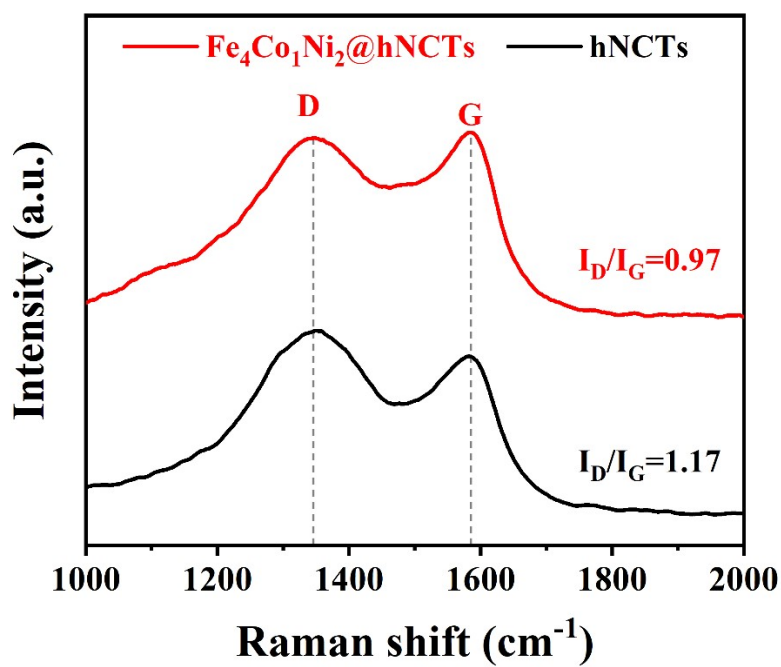

Fig. S10 Raman spectra of  $\text{Fe}_4\text{Co}_1\text{Ni}_2@\text{hNCTs}$  and hNCTs.

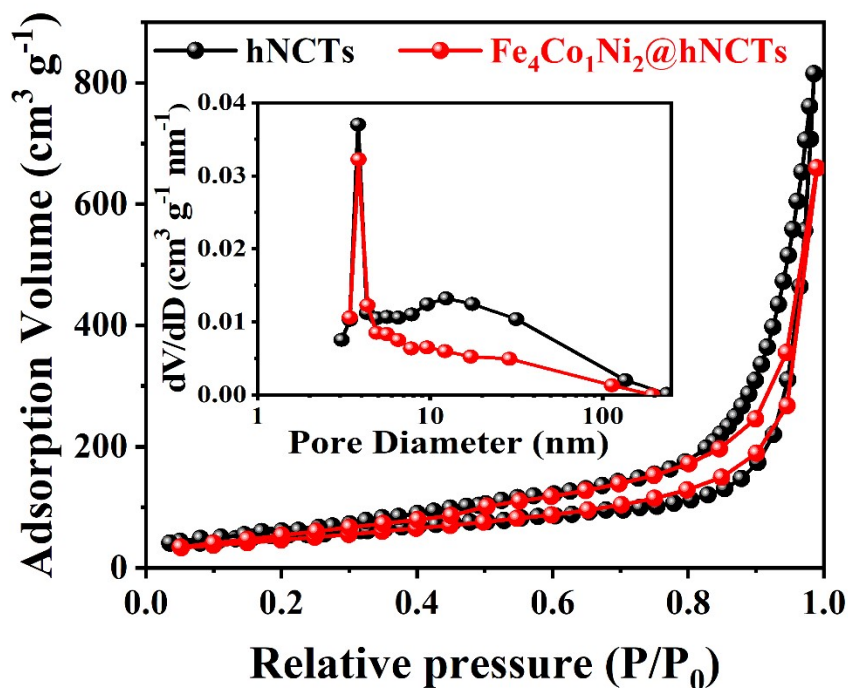

Fig. S11  $\text{N}_2$  adsorption-desorption isotherms (inset is pore size distribution curves) of  $\text{Fe}_4\text{Co}_1\text{Ni}_2@\text{hNCTs}$  and hNCTs.



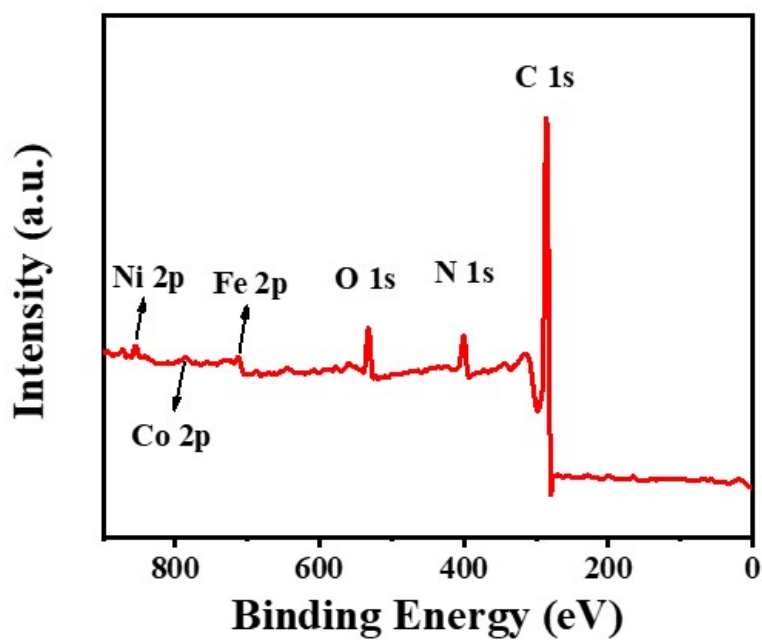

Fig. S12 XPS survey spectra of  $\text{Fe}_4\text{Co}_1\text{Ni}_2@h\text{NCTs}$ .

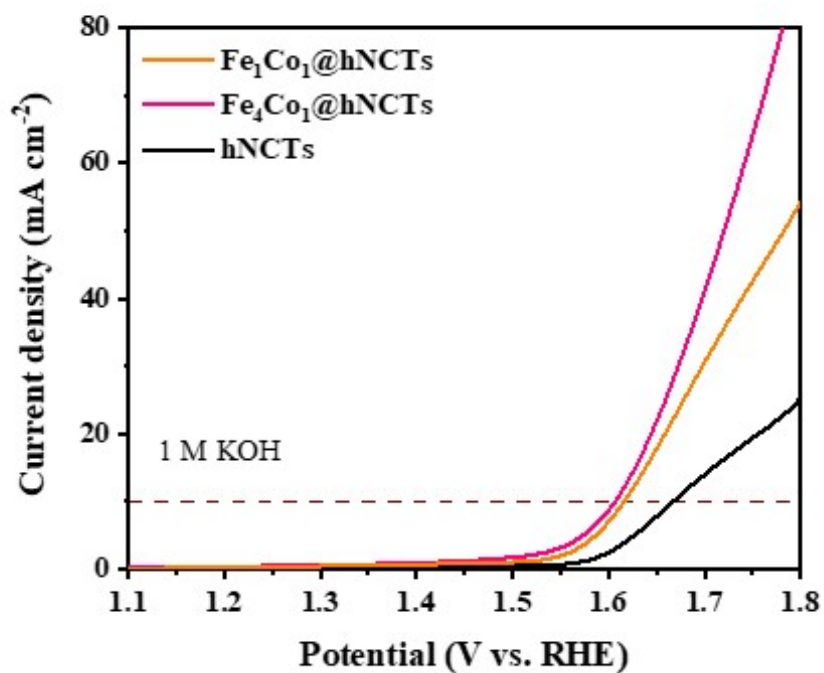

Fig. S13 LSV curves of  $\text{Fe}_4\text{Co}_1@h\text{NCTs}$ ,  $\text{Fe}_1\text{Co}_1@h\text{NCTs}$  and  $h\text{NCTs}$  in 1.0 M KOH at a scan rate of  $10 \text{ mV s}^{-1}$ .

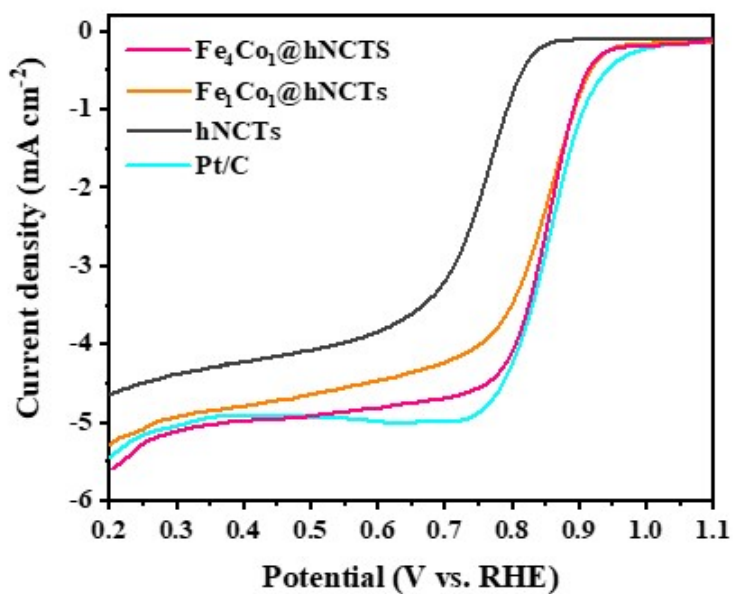

**Fig. S14** LSV curves of the ORR in an O<sub>2</sub>-saturated 0.1 M KOH solution at the rotation rate of 1600 rpm and a scan rate of 10 mV s<sup>-1</sup>.

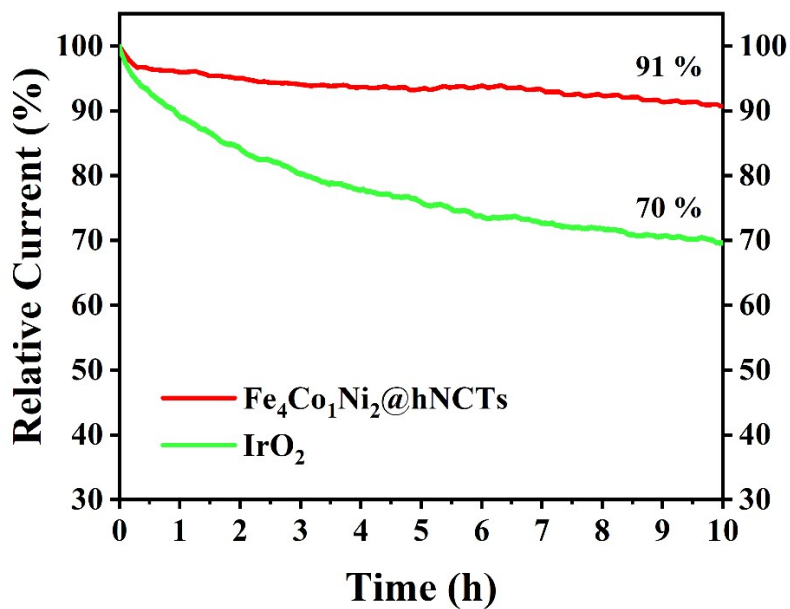

**Fig. S15** OER chronoamperometric response of Fe<sub>4</sub>Co<sub>1</sub>Ni<sub>2</sub>@hNCTS and IrO<sub>2</sub> at a constant potential of 1.60 V (vs. RHE) in 1.0 M KOH.

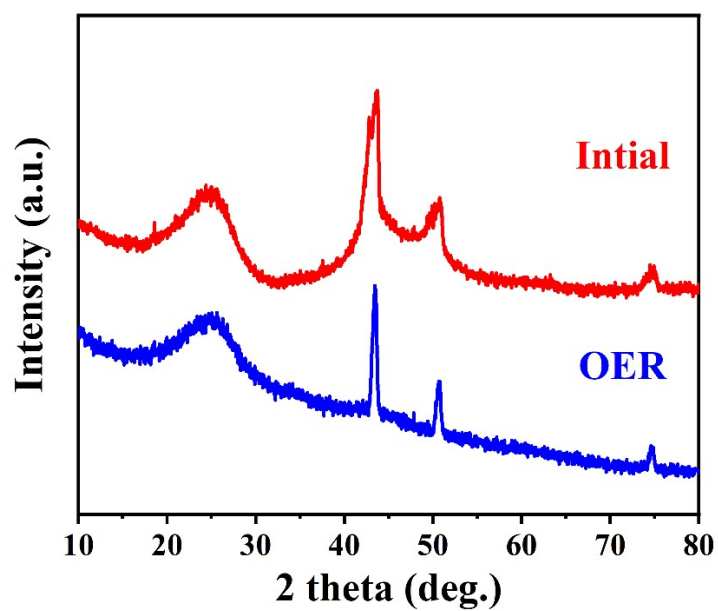

**Fig. S16** XRD pattern of  $\text{Fe}_4\text{Co}_1\text{Ni}_2@\text{hNCTs}$  before and after 10 h OER testing.

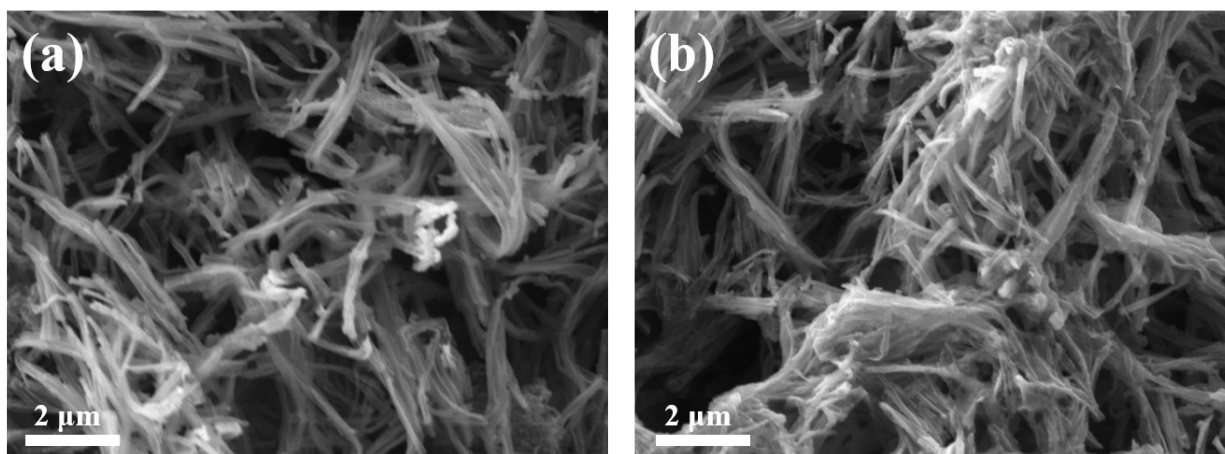

**Fig. S17** SEM images of  $\text{Fe}_4\text{Co}_1\text{Ni}_2@\text{hNCTs}$  before (a) and after 10 h OER testing (b).

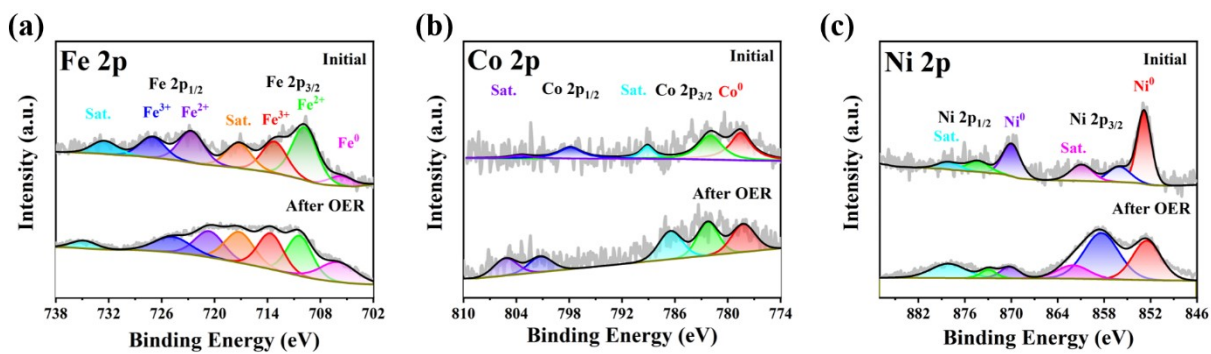

**Fig. S18** XPS spectra of a) Fe 2p, b) Co 2p and c) Ni 2p for  $\text{Fe}_4\text{Co}_1\text{Ni}_2@\text{hNCTs}$  after 10 h OER testing.

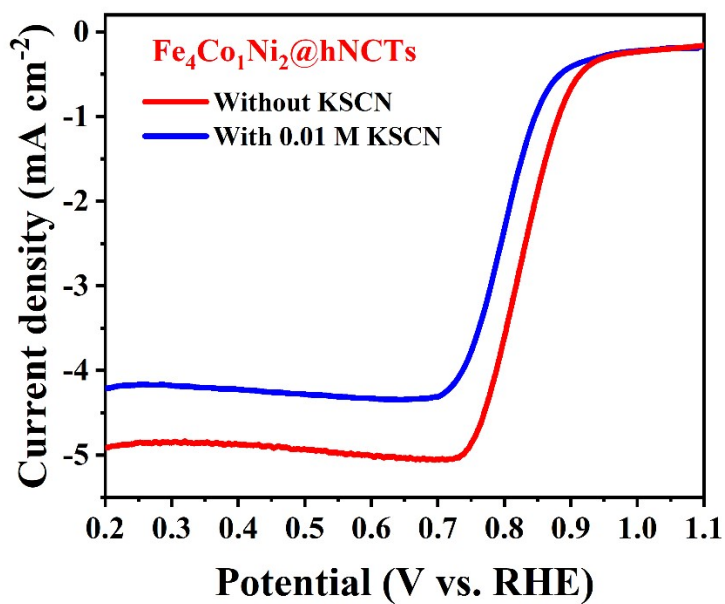

**Fig. S19** LSV of  $\text{Fe}_4\text{Co}_1\text{Ni}_2@\text{hNCTs}$  in 0.1 M KOH with and without KSCN.

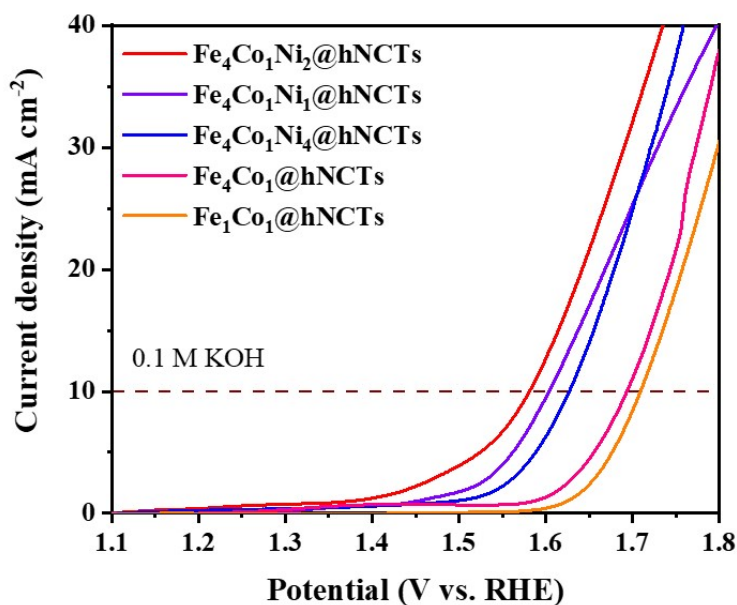

**Fig. S20** LSV curves of  $\text{Fe}_4\text{Co}_1\text{Ni}_1@h\text{NCTs}$ ,  $\text{Fe}_4\text{Co}_1\text{Ni}_2@h\text{NCTs}$ ,  $\text{Fe}_4\text{Co}_1\text{Ni}_4@h\text{NCTs}$ ,  $\text{Fe}_4\text{Co}_1@h\text{NCTs}$  and  $\text{Fe}_1\text{Co}_1@h\text{NCTs}$  in 0.1 M KOH at the rotation rate of 1600 rpm and a scan rate of  $10 \text{ mV s}^{-1}$ .

## 2. Supplementary Tables

**Table S1.** EXAFS fitting parameters at the Co K-edge for various samples ( $S_0^2=0.679$  for Fe,  $S_0^2=0.696$  for Co,  $S_0^2=0.715$  for Ni )

| Sample                  | Shell  | CN <sup>a</sup> | R(Å) <sup>b</sup>   | $\sigma^2(\text{Å}^2)$ <sup>c</sup> | $\Delta E_0(\text{eV})$ <sup>d</sup> | R factor |
|-------------------------|--------|-----------------|---------------------|-------------------------------------|--------------------------------------|----------|
| Fe Foil                 | Fe-Fe1 | 8*              | $2.46 \pm 0.0$<br>1 | $0.00481 \pm 0.001$<br>9            | $5.36 \pm 2.8$<br>8                  | 0.006    |
|                         | Fe-Fe2 | 6*              | $2.84 \pm 0.0$<br>1 | $0.00493 \pm 0.002$<br>9            | $5.31 \pm 4.2$<br>6                  |          |
| $\text{Fe}_2\text{O}_3$ | Fe-O   | $4.6 \pm 1.1$   | $1.97 \pm 0.01$     | $0.01 \pm 0.004$                    | $-6.1 \pm 3.2$                       | 0.019    |
|                         | Fe-Fe  | $4.7 \pm 1.0$   | $2.97 \pm 0.01$     | $0.006 \pm 0.0019$                  | $-1.5 \pm 1.9$                       |          |
|                         | Fe-Fe  | $3.2 \pm 1.4$   | $3.44 \pm 0.01$     | $0.00006 \pm 0.0027$                | $14.1 \pm 3.3$                       |          |

|                                |       |              |               |               |                    |       |
|--------------------------------|-------|--------------|---------------|---------------|--------------------|-------|
| FeO                            | Fe-O  | 1.5±0.2      | 2.14±0.01     | 0.002±0.001   | 8.33±1.9           | 0.018 |
|                                | Fe-Fe | 8.6±1.7      | 3.03±0.01     | 0.01±0.002    | -0.78±1.8          |       |
| Sample Fe                      | Fe-N  | 1.2±0.8      | 1.89±0.0<br>1 | 0.01±0.002    | 5.16±12.<br>9      | 0.013 |
|                                | Fe-Fe | 3.0±0.4      | 2.49±0.0<br>1 | 0.006±0.001   | 6.37±1.6           |       |
| Co foil                        | Co-Co | 12*          | 2.49±0.0<br>1 | 0.0061±0.0004 | -<br>5.9±0.59<br>5 | 0.004 |
| Co <sub>3</sub> O <sub>4</sub> | Co-O  | 5.2±0.5      | 1.91±0.01     | 0.0025±0.0009 | -6.5±1.5           | 0.006 |
|                                | Co-Co | 3.9±1.1      | 2.84±0.01     | 0.0027±0.0015 | -7.5±2.5           |       |
|                                | Co-Co | 11.7±3.2     | 3.35±0.01     | 0.0079±0.002  | -7.8±1.8           |       |
| Sample Co                      | Co-N  | 1.2±0.6      | 1.96±0.0<br>1 | 0.002±0.008   | 6.84±13.<br>89     | 0.009 |
|                                | Co-Co | 6.2±0.4      | 2.50±0.0<br>1 | 0.007±0.0009  | 7.81±1.1<br>4      |       |
| Ni Foil                        | Ni-Ni | 12*          | 2.48±0.01     | 0.005±0.0002  | 0.71±0.02          | 0.002 |
| NiO                            | Ni-O  | 5.5±0.6      | 2.08±0.0<br>1 | 0.005±0.001   | -1.9±1.4           | 0.003 |
|                                | Ni-Ni | 12.2±1.<br>0 | 2.94±0.0<br>1 | 0.008±0.0007  | -5.1±0.8           |       |
| Sample Ni                      | Ni-N  | 2.1±1.7      | 1.93±0.0<br>1 | 0.008±0.01    | -6.2±11.1          | 0.007 |
|                                | Ni-Ni | 6.9±0.6      | 2.51±0.0<br>1 | 0.006±0.0007  | 7.3±1.0            |       |

**Note:** <sup>a</sup>CN, coordination number; <sup>b</sup>R, distance between absorber and backscatter atoms; <sup>c</sup>σ<sup>2</sup>, Debye-Waller factor to account for both thermal and structural disorders; <sup>d</sup>ΔE<sub>0</sub>, inner potential correction; R factor indicates the goodness of the fit. S<sub>0</sub><sup>2</sup> was fixed to 0.696 for Co, 0.679 for Fe and 0.715 for Ni, according to the experimental EXAFS fit of Co foil, Fe Foil and Ni Foil by fixing CN as the known crystallographic value.

**Table S2.** Comparison of other reported transition metal-doped electrocatalysts.

|    | <b>Catalysts</b>                                       | $E_{j=10}$ | $E_{1/2}$ | <b>Electrolyte</b> | $\Delta E$   | <b>Ref</b> |
|----|--------------------------------------------------------|------------|-----------|--------------------|--------------|------------|
| 1  | Fe <sub>4</sub> Co <sub>1</sub> Ni <sub>2</sub> @hNCTs | 1.58       | 0.83      | 0.1 M KOH          | <b>0.75</b>  | This work  |
| 2  | Co@hNCTs                                               | 1.63       | 0.87      | 0.1 M KOH          | <b>0.76</b>  | 1          |
| 3  | Fe <sub>1,2</sub> Co@NC/NCNTs                          | 1.585      | 0.82      | 0.1 M KOH          | <b>0.765</b> | 2          |
| 4  | C/CoFe-30-650                                          | 1.58       | 0.81      | 0.1 M KOH          | <b>0.77</b>  | 3          |
| 5  | Co/NGC-3                                               | 1.626      | 0.85      | 0.1 M KOH          | <b>0.776</b> | 4          |
| 6  | Co/HMSC                                                | 1.626      | 0.84      | 0.1 M KOH          | <b>0.786</b> | 5          |
| 7  | N-CoNi/PCS                                             | 1.6        | 0.8       | 0.1 M KOH          | <b>0.8</b>   | 6          |
| 8  | N-GCNT/FeCo <sub>3</sub>                               | 1.73       | 0.92      | 0.1 M KOH          | <b>0.81</b>  | 7          |
| 9  | FeNi-NC                                                | 1.64       | 0.83      | 0.1 M KOH          | <b>0.81</b>  | 8          |
| 10 | CoFe@NCNTs                                             | 1.68       | 0.84      | 0.1 M KOH          | <b>0.84</b>  | 9          |
| 11 | CoNi@N-C                                               | 1.73       | 0.82      | 0.1 M KOH          | <b>0.91</b>  | 10         |

### 3. Supplementary References

1. Q. Zhou, Z. Zhang, J. Cai, B. Liu, Y. Zhang, X. Gong, X. Sui, A. Yu, L. Zhao and Z. Wang, *Nano Energy*, 2020, **71**, 104592.
2. S. Li, W. Chen, H. Pan, Y. Cao, Z. Jiang, X. Tian, X. Hao, T. Maiyalagan and Z.-J. Jiang, *ACS Sustainable Chemistry & Engineering*, 2019, **7**, 8530-8541.
3. F. Shi, K. Zhu, X. Li, E. Wang, X. Zhu and W. Yang, *Journal of Energy Chemistry*, 2021, **61**, 327-335.
4. J. Li, Y. Kang, D. Liu, Z. Lei and P. Liu, *ACS applied materials & interfaces*, 2020, **12**, 5717-5729.
5. P. Zhu, J. Gao and S. Liu, *J. Power Sources*, 2020, **449**, 227512.
6. L. Chen, Z. Xu, W. Han, Q. Zhang, Z. Bai, Z. Chen, G. Li and X. Wang, *ACS Applied Nano Materials*, 2020, **3**, 1354-1362.
7. C. Y. Su, H. Cheng, W. Li, Z. Q. Liu, N. Li, Z. Hou, F. Q. Bai, H. X. Zhang and T. Y. Ma, *Advanced Energy Materials*, 2017, **7**, 1602420.
8. L. Yang, X. Zeng, D. Wang and D. Cao, *Energy Storage Materials*, 2018, **12**, 277-283.
9. P. Cai, Y. Hong, S. Ci and Z. Wen, *Nanoscale*, 2016, **8**, 20048-20055.
10. H. Ning, G. Li, Y. Chen, K. Zhang, Z. Gong, R. Nie, W. Hu and Q. Xia, *ACS Appl Mater Interfaces*, 2019, **11**, 1957-1968.
